# Supplementary material for: Multifunctional CeO2incorporated Fe2O3anchored on a rich porous structured carbon backbone for supercapacitors and adsorption of acid orange II
Source: Royal Society of Chemistry journal article supplement (doi:10.1039/d2ma00377e), 2022-01-01
Supplement: d2ma00377e1.pdf [file d2ma00377e1.pdf]

## Supplementary Information

### **Multifunctional CeO<sub>2</sub> incorporated Fe<sub>2</sub>O<sub>3</sub> anchored on a rich porous structured carbon backbone for supercapacitors and Adsorption of Acid orange II**

Hang Zhang,<sup>a</sup> Lijuan Xia,<sup>a</sup> Jianping Tang,<sup>a</sup> Yuan Li,<sup>a</sup> Lei Wang,<sup>a\*</sup> Chuying Ouyang,<sup>b\*</sup> Shengliang Zhong<sup>a\*</sup>

<sup>a</sup> *Key Lab of Fluorine and Silicon for Energy Materials and Chemistry of Ministry of Education, College of Chemistry and Chemical Engineering, Jiangxi Normal University, Nanchang, 330022, China. E-mail: slzhong@jxnu.edu.cn*

<sup>b</sup> *Department of Physics, Laboratory of Computational Materials Physics, Jiangxi Normal University, Nanchang, 330022, P.R. China*

\*corresponding author.

\*E-mail: slzhong@jxnu.edu.cn

**Table S1** Yield and productivity of the materials in the experiment.

| Samples | m (g)   |         |         | (g)     | Rate   |
|---------|---------|---------|---------|---------|--------|
|         | m1 (g)  | m2 (g)  | m3 (g)  |         |        |
| Raw     | 0.09822 | 0.10038 | 0.09987 | 0.09949 | /      |
| Ce-DDA  | 0.08643 | 0.10032 | 0.09689 | 0.09455 | 95.03% |
| CF      | 0.06465 | 0.06889 | 0.07122 | 0.06825 | 68.60% |
| CFC     | 0.08066 | 0.08842 | 0.08454 | 0.08454 | 84.97% |

**Table S2** Samples and corresponding experiment parameters.

| Sample | Reaction Temperature (°C) | Reaction Time (h) | n (Ce <sup>3+</sup> ) (mmol) | n(C <sub>12</sub> H <sub>10</sub> FeO <sub>4</sub> ) (mmol) | Molar ratio of C <sub>12</sub> H <sub>10</sub> FeO <sub>4</sub> and Ce <sup>3+</sup> |
|--------|---------------------------|-------------------|------------------------------|-------------------------------------------------------------|--------------------------------------------------------------------------------------|
| 1      | 140                       | 12                | 0.1                          | 0.2                                                         | 1:2                                                                                  |
| 2      | 140                       | 8                 | 0.1                          | 0.2                                                         | 1:2                                                                                  |
| 3      | 140                       | 16                | 0.1                          | 0.2                                                         | 1:2                                                                                  |
| 4      | 140                       | 20                | 0.1                          | 0.2                                                         | 1:2                                                                                  |
| 5      | 120                       | 12                | 0.1                          | 0.2                                                         | 1:2                                                                                  |
| 6      | 160                       | 12                | 0.1                          | 0.2                                                         | 1:2                                                                                  |
| 7      | 180                       | 12                | 0.1                          | 0.2                                                         | 1:2                                                                                  |
| 8      | 200                       | 12                | 0.1                          | 0.2                                                         | 1:2                                                                                  |
| 9      | 140                       | 12                | 0.1                          | 0.1                                                         | 1:1                                                                                  |
| 10     | 140                       | 12                | 0.1                          | 0.3                                                         | 1:3                                                                                  |
| 11     | 140                       | 12                | 0.1                          | 0.4                                                         | 1:4                                                                                  |
| 12     | 140                       | 12                | 0.1                          | 0.5                                                         | 1:5                                                                                  |

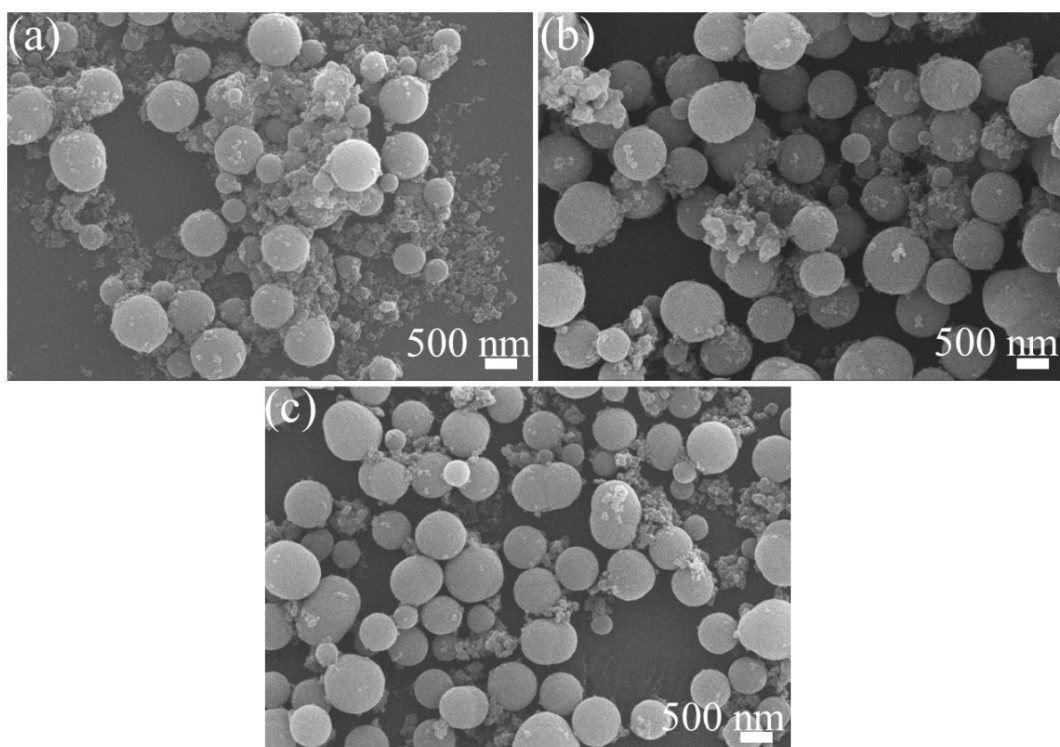

**Fig. S1** SEM images of the precursor prepared at 140 °C for different times: (a) 8 h; (b) 16 h; (c) 20 h.

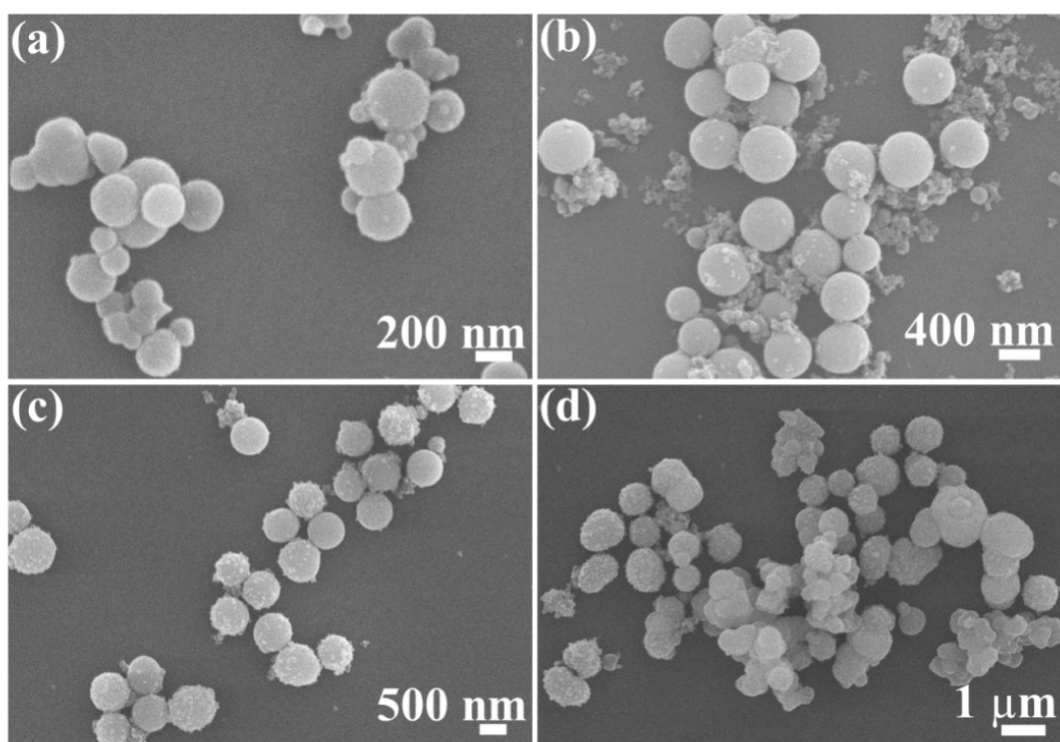

**Fig. S2** SEM images of the precursor prepared at different temperature for 12 h : (a) 120 °C; (b) 160 °C; (c) 180 °C; (d) 200 °C.

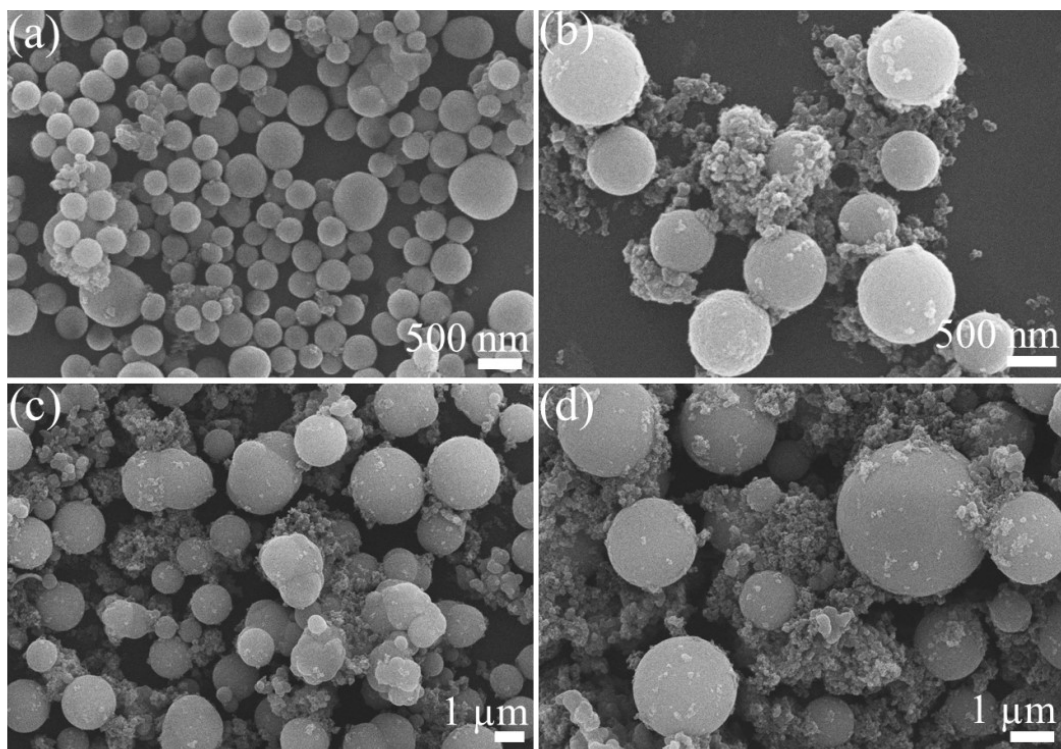

**Fig. S3** SEM images of the products prepared at 140 °C for 12 h with various molar ratios of  $\text{Ce}(\text{NO}_3)_3 \cdot 6\text{H}_2\text{O}$  to  $\text{C}_{12}\text{H}_{10}\text{FeO}_4$ : (a) 1:1; (b) 1:3; (c) 1:4; and (d) 1:5.

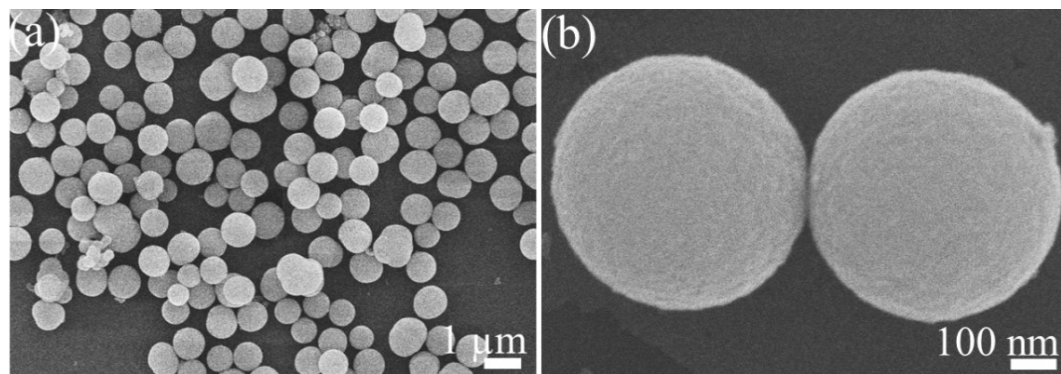

**Fig. S4** (a, b) SEM images of the Ce-DDA precursor prepared at 140 °C for 12 h with  $\text{Ce}(\text{NO}_3)_3 \cdot 6\text{H}_2\text{O}$  to  $\text{C}_{12}\text{H}_{10}\text{FeO}_4 = 1:2$ .

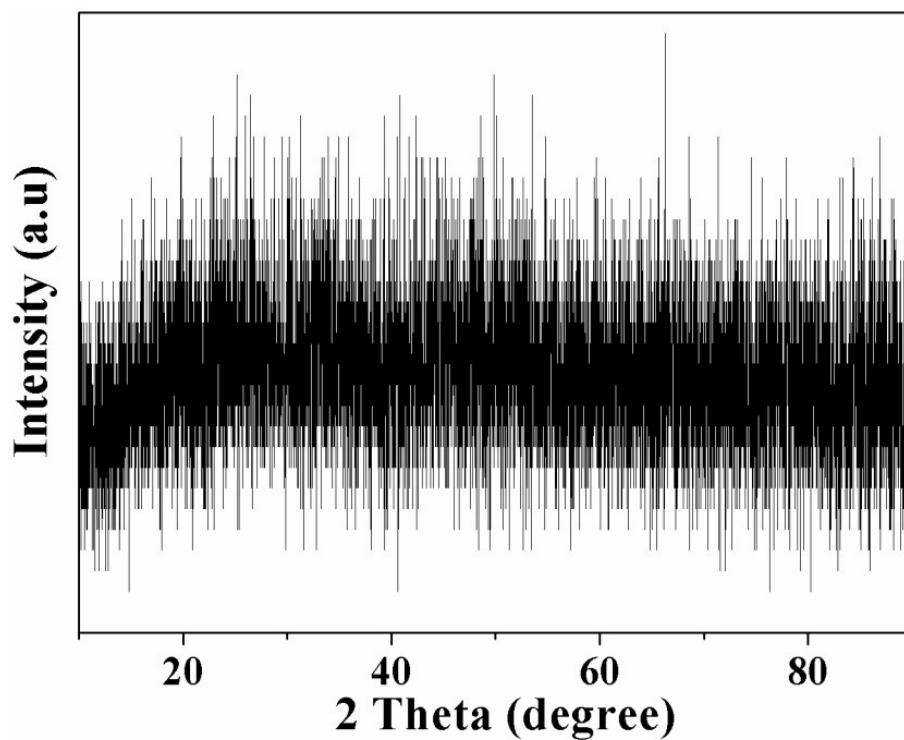

Fig. S5. XRD patterns of the precursor.

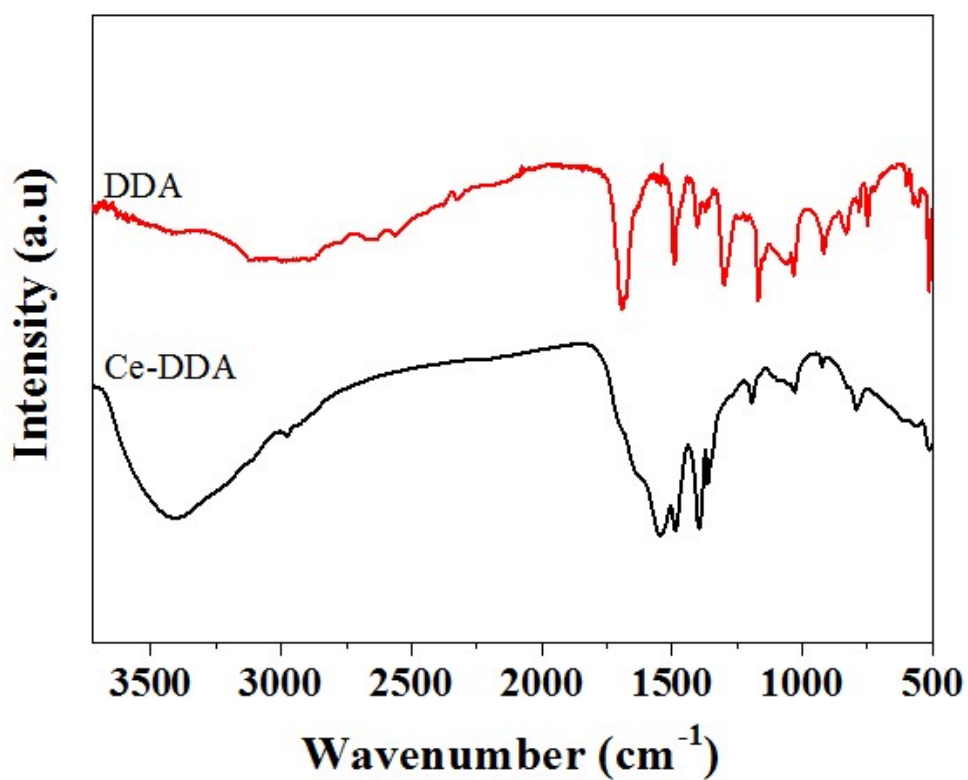

Fig. S6. FTIR patterns of the DDA ligand and Ce-DDA.

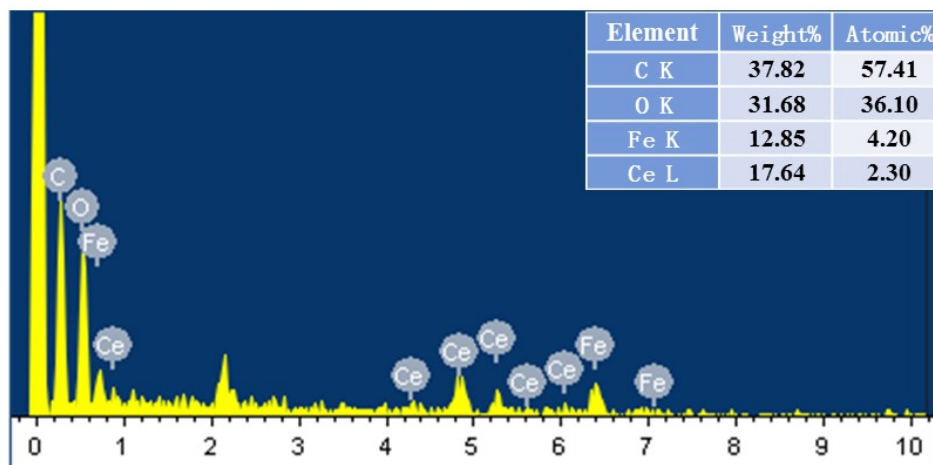

Fig. S7 EDS spectra of the Ce-DDA precursor.

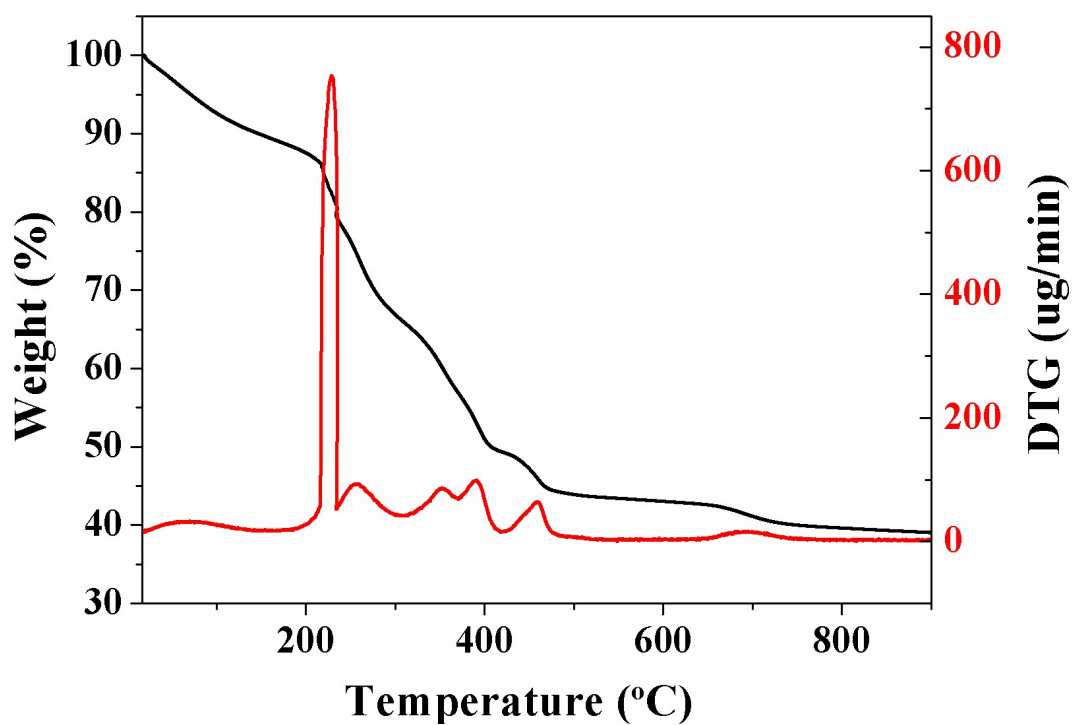

Fig. S8. TG-DTG curves of the precursor.

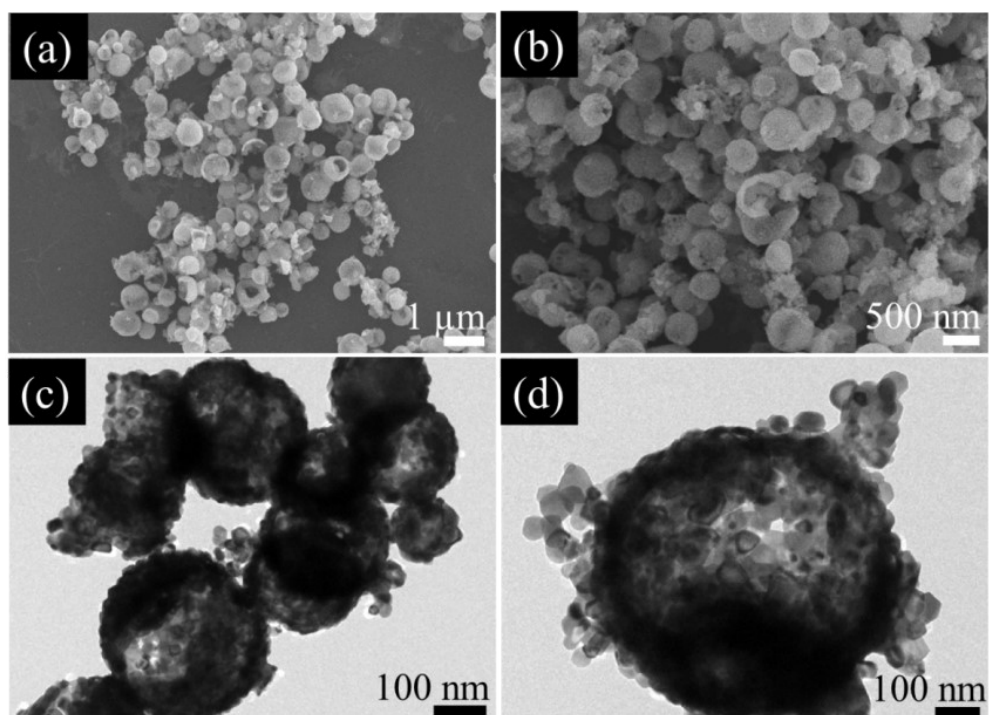

**Fig. S9** SEM images and TEM images of CF obtained after calcination of the precursor in air at 800 °C for 4 h.

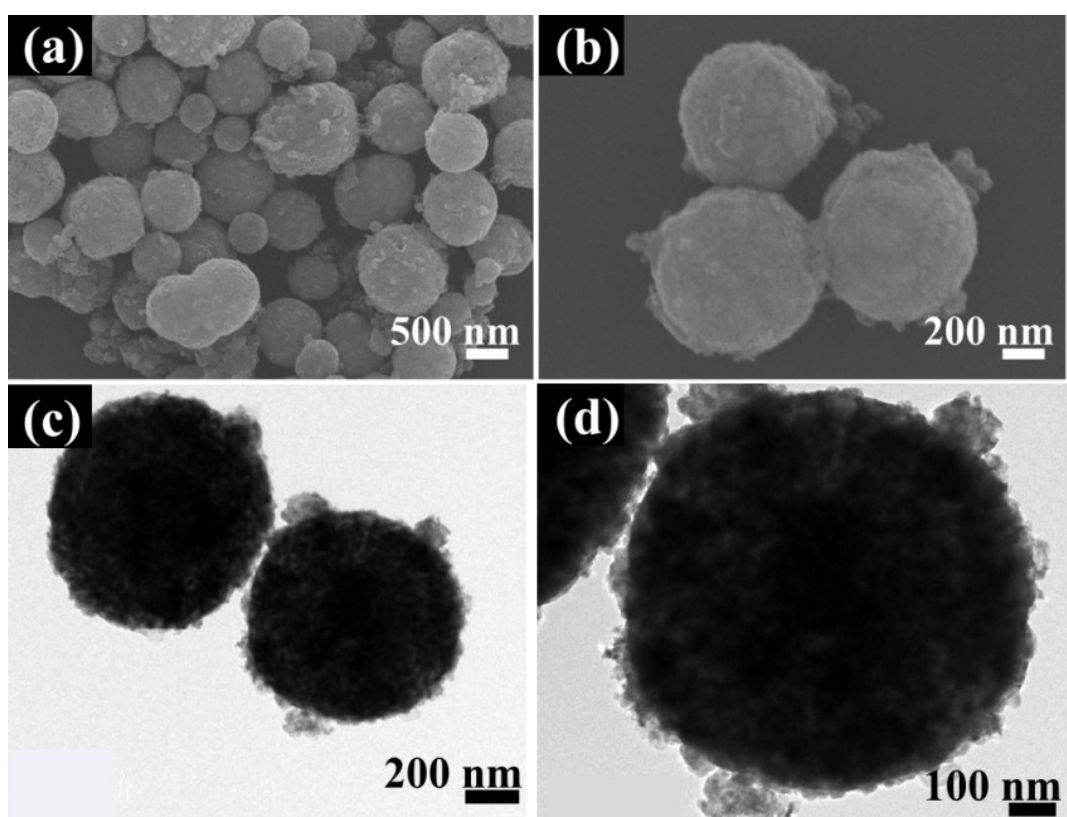

**Fig. S10** SEM images and TEM images of CFC obtained after calcination of the precursor in N<sub>2</sub> at 800 °C for 4 h.



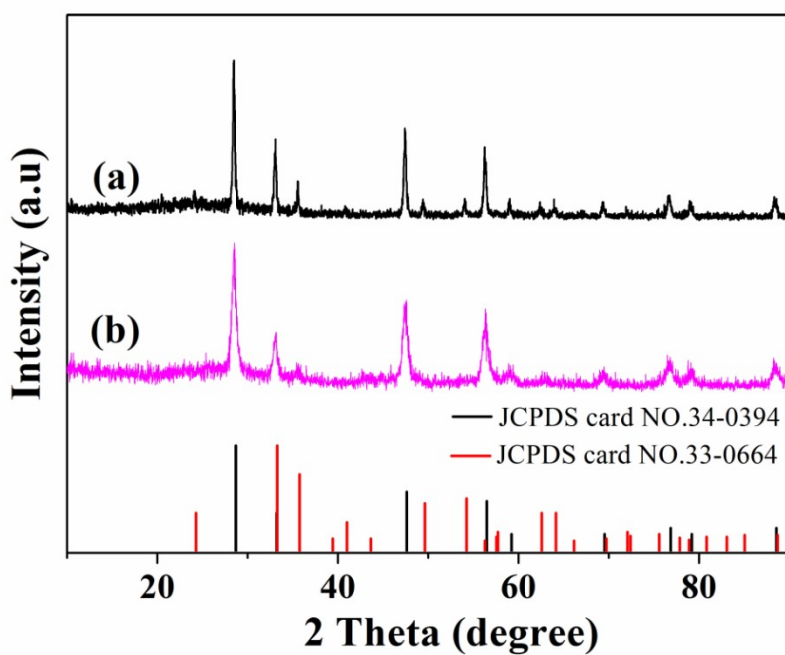

Fig. S11 The XRD patterns of the CF (a) and CFC (b) ( $\text{CeO}_2$ : JCPDS card 34-0394;  $\text{Fe}_2\text{O}_3$ : JCPDS card 33-0664).

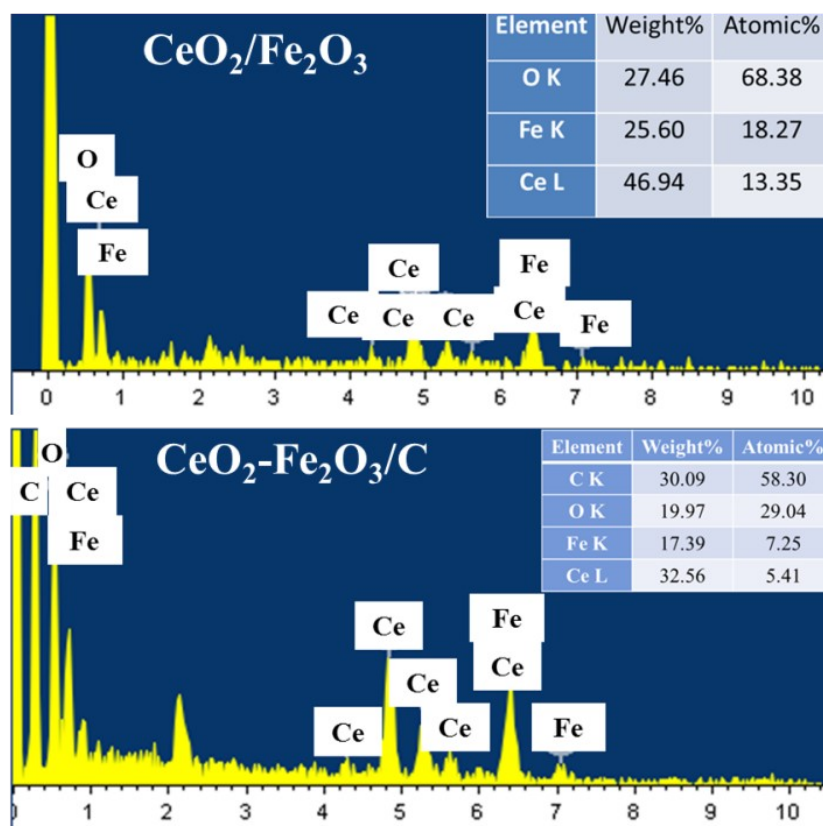

Fig. S12 EDX spectra of the as-prepared CF and CFC.



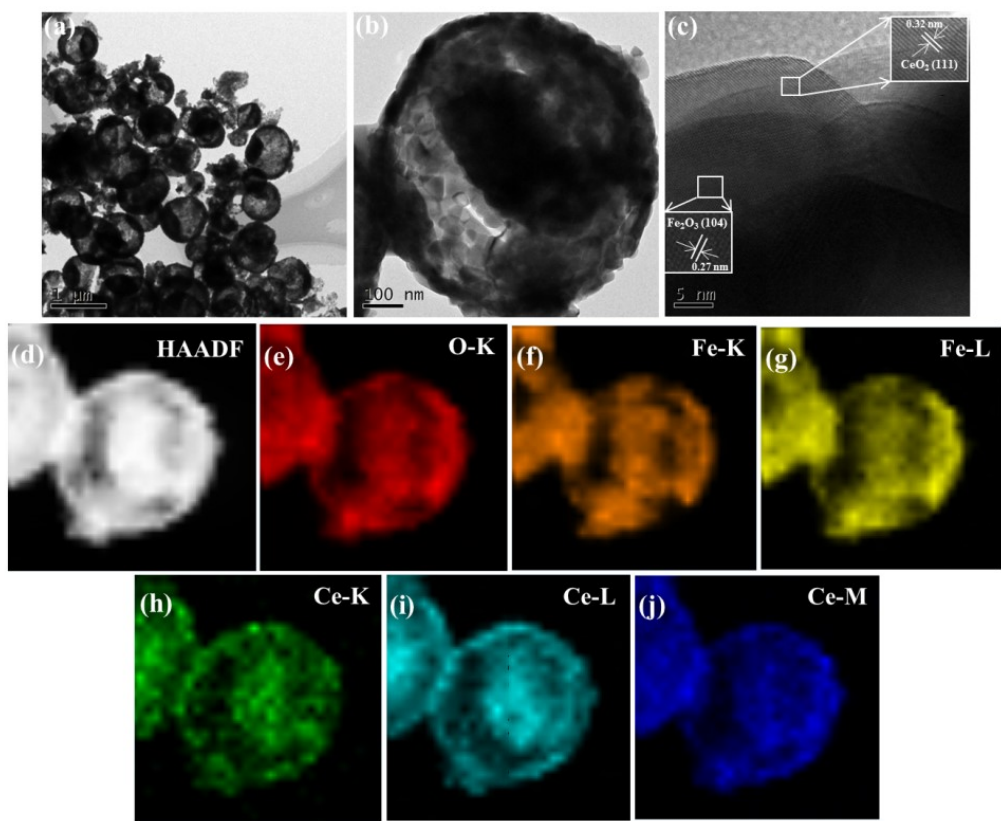

**Fig. S13** TEM and element mapping of CF. a-b TEM image; (c) HRTEM of the selective area; (d) HAADF-S TEM image of CF; e-j: Element mapping of O, Fe and Ce.

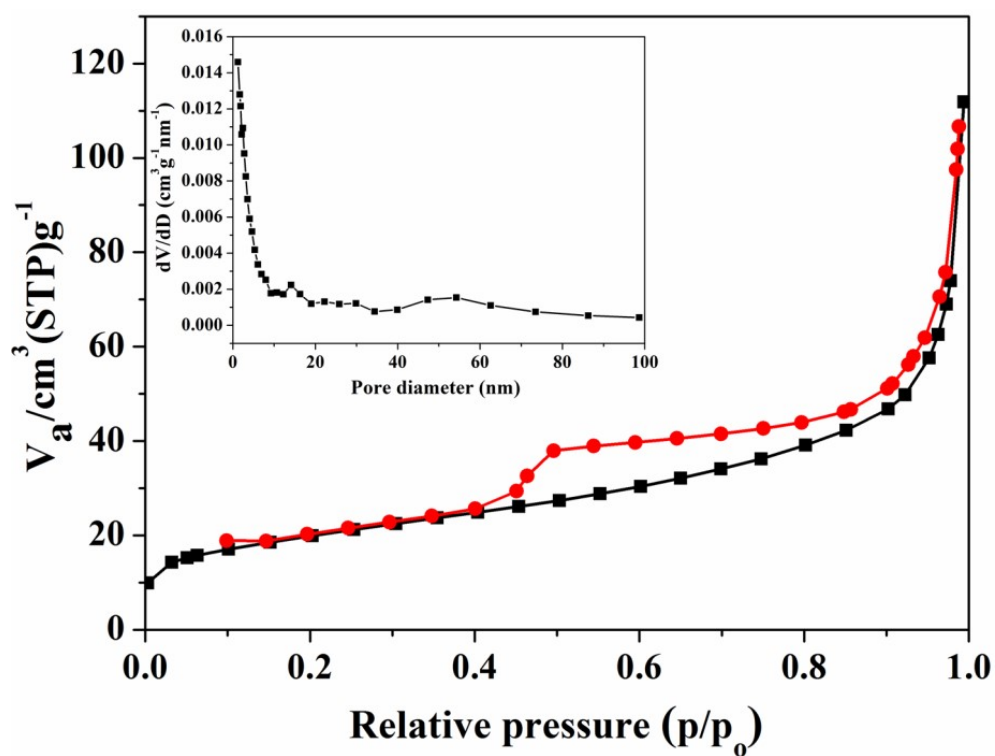

**Fig. S14** Nitrogen adsorption-desorption isotherm of as-synthesized CFC; the inset is the corresponding BJH pore size distribution curve.

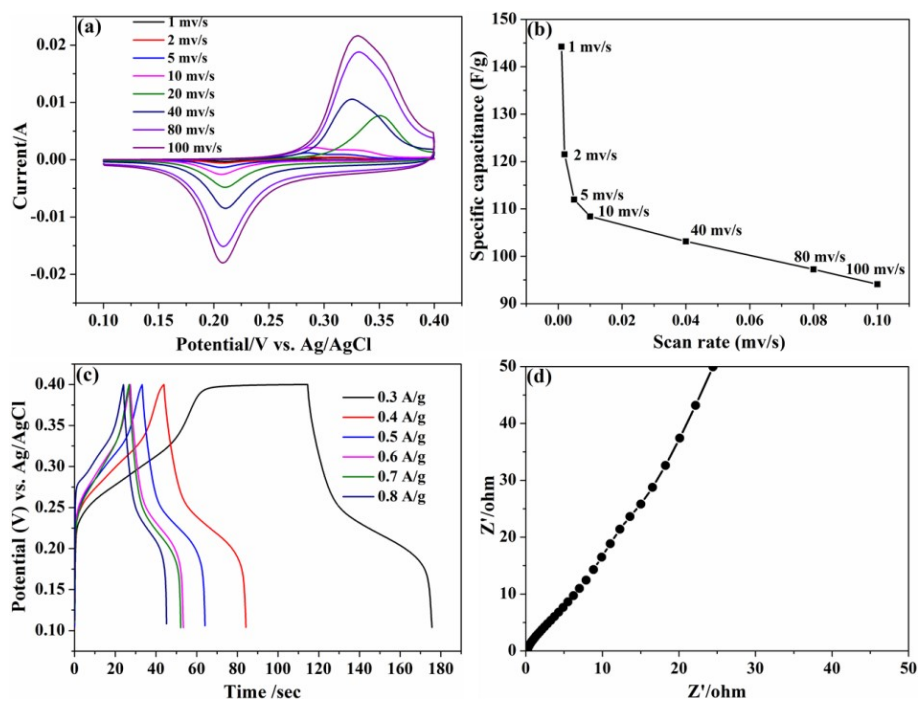

**Fig. S15** a: Cyclic voltammety curves; b: Comparison of specific capacitance at various scan rates of CF electrodes; c: Galvanostatic charge/discharge curves of CF at different current densities; d: Nyquist plots.

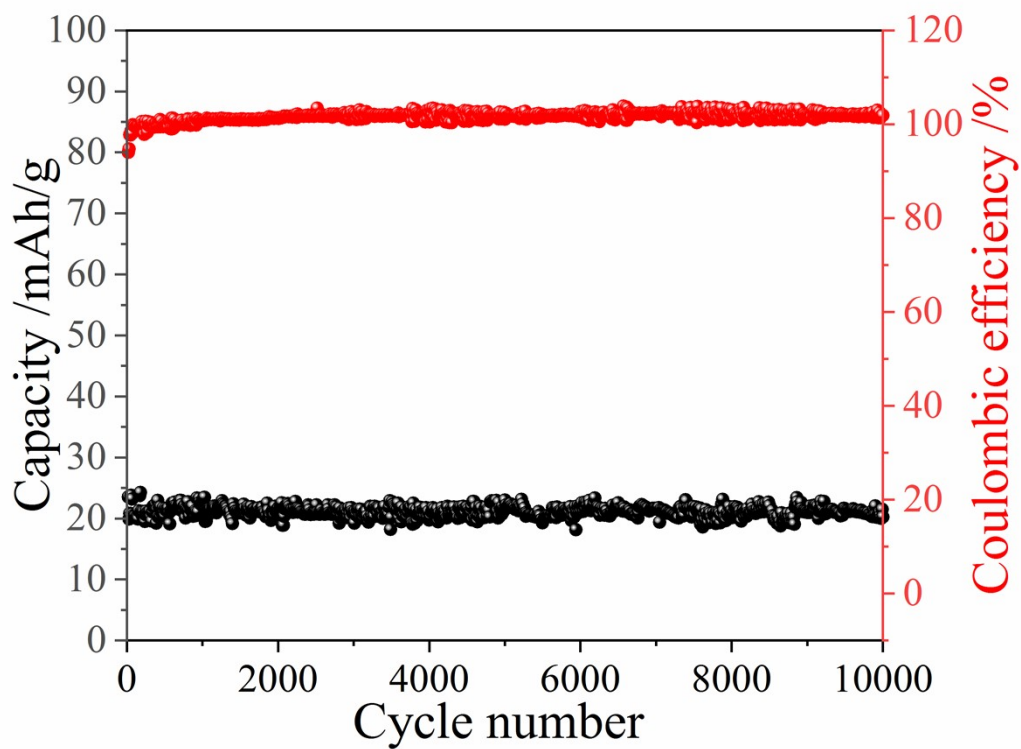

Fig. S16 Cycle performance of CFC electrode.

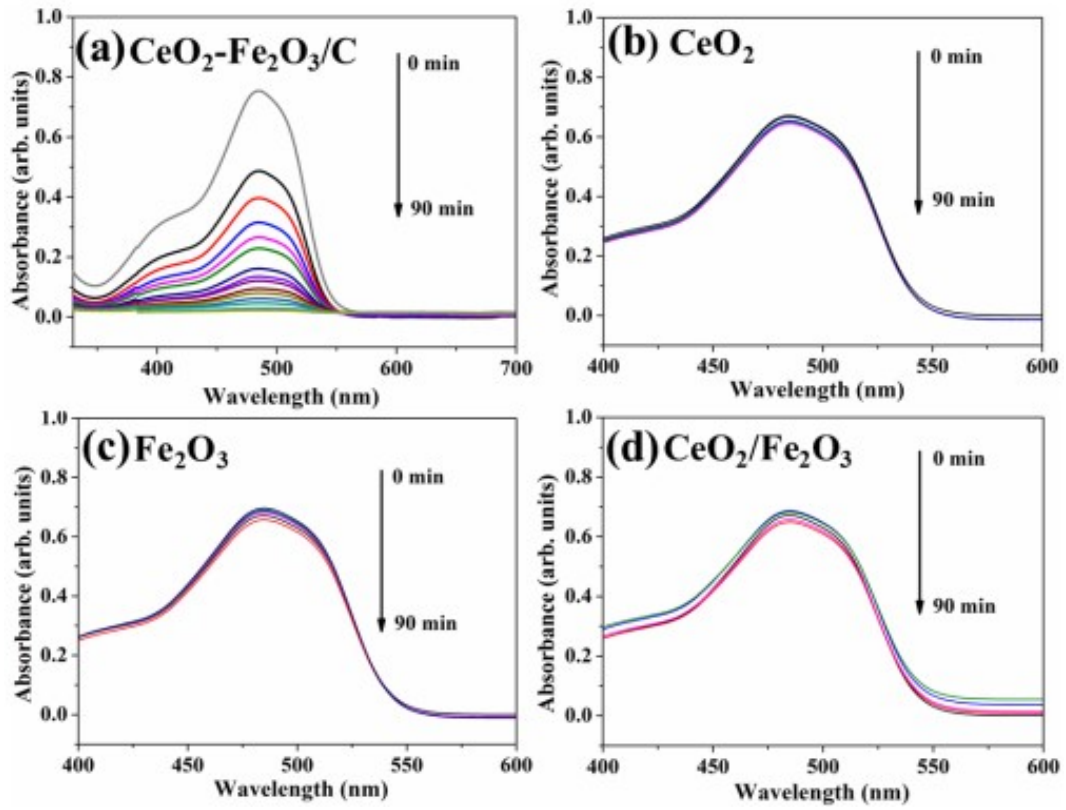

Fig. S17 The absorbance spectra ( $C_0=10$  mg/L) on AO7 adsorption.
